# Supplementary material for: Construction of room temperature phosphorescent materials with ultralong lifetime by in-situ derivation strategy
Source: PubMed Central journal article supplement (PMC10344959; doi:10.1038/s41467-023-39795-6), 2023-07-13
Supplement: 41467_2023_39795_MOESM1_ESM.pdf [file 41467_2023_39795_MOESM1_ESM.pdf]

## Supplementary Information

# Construction of room temperature phosphorescent materials with ultralong lifetime by in-situ derivation strategy

Qinglong Jia<sup>1,+</sup>, Xilong Yan<sup>1,2,3,4,+</sup>, Bowei Wang<sup>1,2,3,4,\*</sup>, Jiayi Li<sup>1</sup>, Wensheng Xu<sup>1</sup>, Zhuoyao Shen<sup>1</sup>,  
Changchang Bo<sup>1</sup>, Yang Li<sup>1,3,4</sup>, Ligong Chen,<sup>1,2,3,4,\*</sup>

<sup>1</sup> School of Chemical Engineering and Technology, Tianjin University, Tianjin 300350, P. R. China.

<sup>2</sup> Zhejiang Institute of Tianjin University, Shaoxing, 312300, P.R. China.

<sup>3</sup> Tianjin Engineering Research Center of Functional Fine Chemicals, Tianjin 300350, P.R. China.

<sup>4</sup> Guangdong Laboratory of Chemistry and Fine Chemical Industry Jieyang Center, Guangdong Province 522000, P.R. China

<sup>+</sup> These authors contributed equally: Qinglong Jia, Xilong Yan.

<sup>\*</sup> Corresponding author at: School of Chemical Engineering and Technology, Tianjin University, Tianjin 300350, P. R. China.

E-mail: bwwang@tju.edu.cn (Bowei Wang, ORCID ID: 0000-0002-9400-0698); lgchen@tju.edu.cn (Ligong Chen, ORCID ID: 0000-0002-3442-5694).

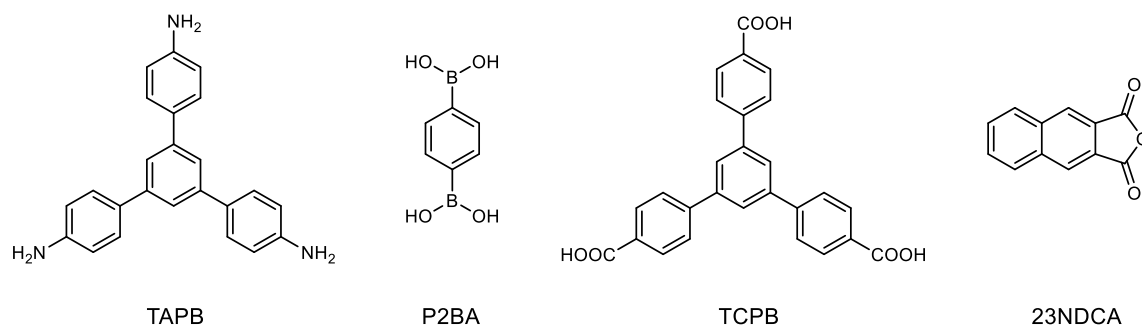

**Supplementary Fig. 1** The chemical structures of TAPB, P2BA, TCPB, 23NDCA in the study.

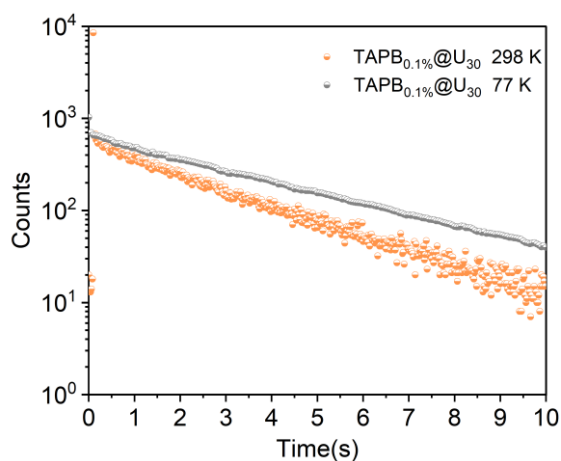

**Supplementary Fig. 2** Phosphorescence decay curve of TAPB<sub>0.1%</sub>@U<sub>30</sub> at 298 and 77 K.

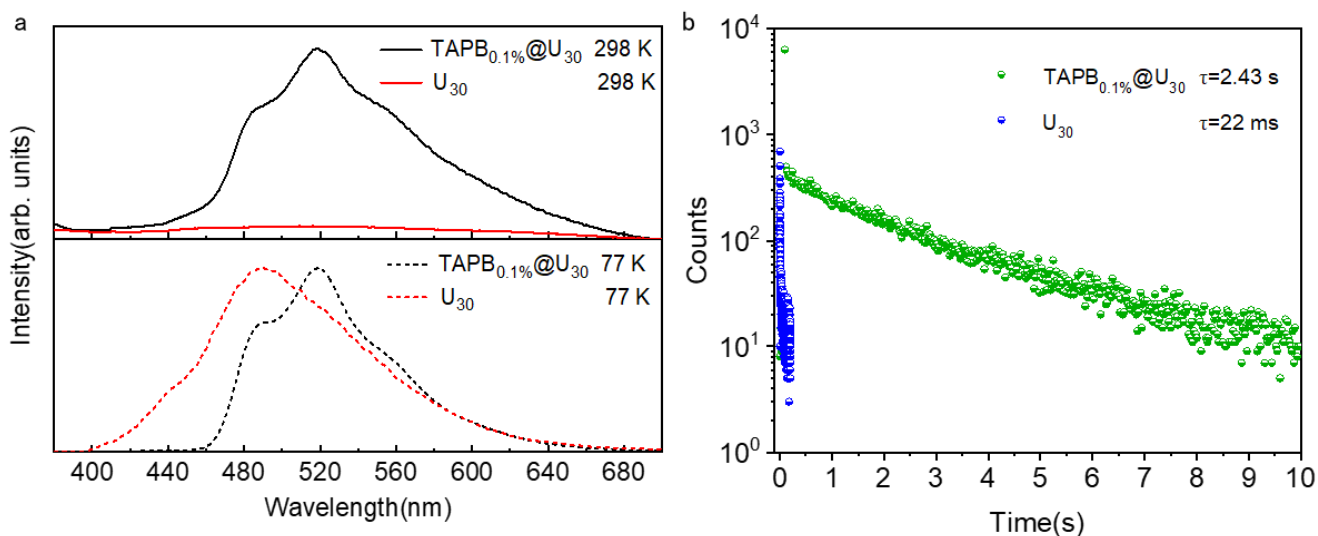

**Supplementary Fig. 3** Photophysical properties of TAPB<sub>0.1%</sub>@U<sub>30</sub> and U<sub>30</sub>. (a) Delayed photoluminescence (PL) spectra of TAPB<sub>0.1%</sub>@U<sub>30</sub> and U<sub>30</sub> at 298 and 77 K (delay 1 ms); (b) Phosphorescence decay curve of TAPB<sub>0.1%</sub>@U<sub>30</sub> and U<sub>30</sub> at 298 K.

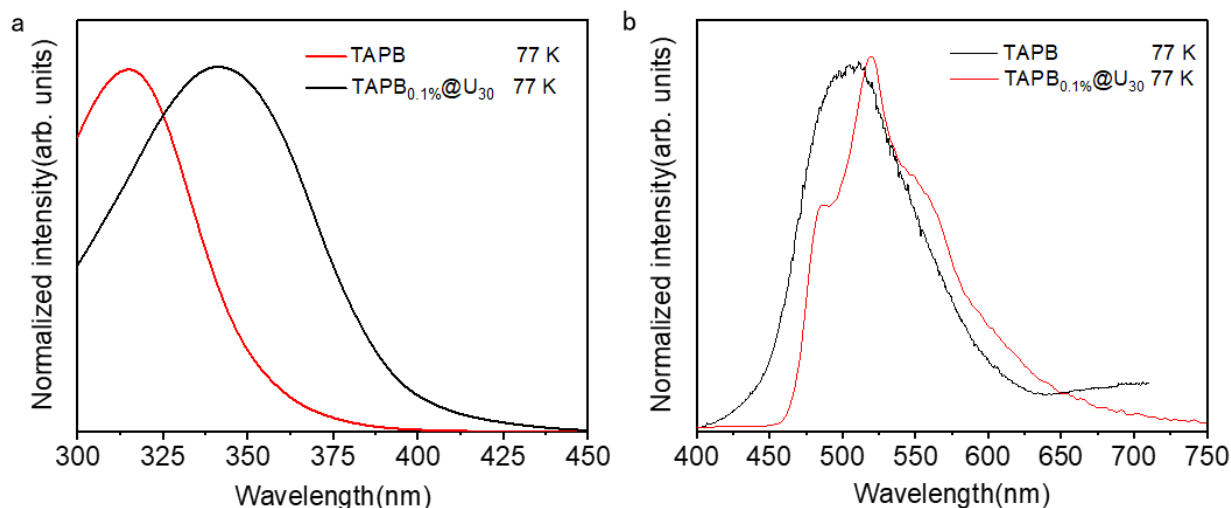

**Supplementary Fig. 4** Photophysical properties of TAPB<sub>0.1%</sub>@U<sub>30</sub> and TAPB. (a) Normalized delayed PL spectra (delay 1 ms) and (b) normalized excitation spectra of TAPB in methanol and TAPB<sub>0.1%</sub>@U<sub>30</sub> solid at 77 K.

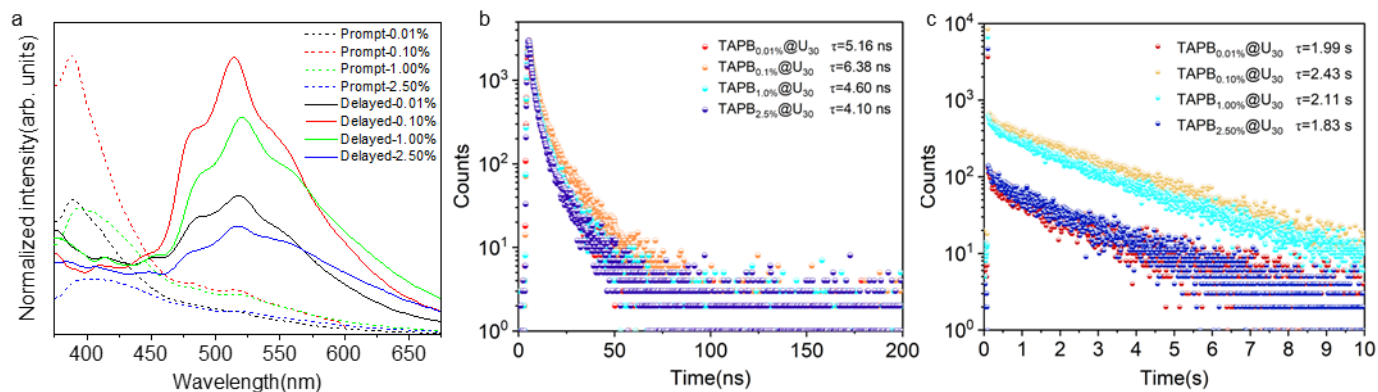

**Supplementary Fig. 5** Photophysical properties of TAPB<sub>x</sub>@U<sub>30</sub> ( $x = 0.01\%$ ,  $0.10\%$ ,  $1.00\%$  and  $2.50\%$ ). (a) Normalized prompt and delayed PL spectra (delay 1 ms) and (b) fluorescence decay curve, (c) phosphorescence decay curve of TAPB<sub>x</sub>@U<sub>30</sub> ( $x = 0.01\%$ ,  $0.10\%$ ,  $1.00\%$  and  $2.50\%$ ) composites, excited at 365 nm and recorded at 519 nm, respectively.

**Supplementary Table 1** Photophysical properties of TAPB<sub>x</sub>@U<sub>30</sub> ( $x = 0.01\%$ ,  $0.10\%$ ,  $1.00\%$  and  $2.50\%$ ) composites at the room temperature, excited at 365 nm.

| TAPB <sub>x</sub> @U <sub>30</sub> | $\lambda_F$<br>[nm] | $\lambda_{ph}$<br>[nm] | $\tau_F$<br>[ns] | $\tau_{Ph}$<br>[s] | $\Phi_F$<br>[%] | $\Phi_{Ph}$<br>[%] | $K_rF$<br>(s <sup>-1</sup> ) | $K_{nr}F$<br>(s <sup>-1</sup> ) | $K_{isc}$<br>(s <sup>-1</sup> ) | $K_rP$<br>(s <sup>-1</sup> ) | $K_{nr}P$<br>(s <sup>-1</sup> ) |
|------------------------------------|---------------------|------------------------|------------------|--------------------|-----------------|--------------------|------------------------------|---------------------------------|---------------------------------|------------------------------|---------------------------------|
| <b>0.01%</b>                       | 390                 | 519                    | 5.16             | 1.99               | 21.44           | 7.58               | $4.15 \times 10^7$           | $1.38 \times 10^6$              | $1.47 \times 10^7$              | 0.038                        | 0.464                           |
| <b>0.10%</b>                       | 391                 | 519                    | 6.38             | 2.43               | 10.13           | 5.37               | $1.59 \times 10^7$           | $1.32 \times 10^6$              | $8.42 \times 10^6$              | 0.022                        | 0.389                           |
| <b>1.00%</b>                       | 408                 | 519                    | 4.6              | 2.11               | 3.92            | 2.61               | $8.52 \times 10^6$           | $2.03 \times 10^6$              | $5.68 \times 10^6$              | 0.012                        | 0.462                           |
| <b>2.50%</b>                       | 428                 | 523                    | 4.1              | 1.83               | 1.92            | 1.96               | $4.68 \times 10^6$           | $2.34 \times 10^6$              | $4.79 \times 10^6$              | 0.011                        | 0.536                           |

$\lambda_F$ : fluorescence emission;  $\lambda_{Ph}$ : phosphorescence emission;  $\tau_F$ : fluorescence lifetime;  $\tau_{Ph}$ : phosphorescence lifetime;  $\Phi_F$ : fluorescence quantum yield;  $\Phi_{Ph}$ : phosphorescence quantum yield;  $K_rF$ : radiative decay rate of fluorescence;  $K_{nr}F$ : nonradiative decay rate of fluorescence;  $K_{isc}$ : The intersystem crossing rate constant;  $K_rP$ : radiative decay rate of phosphorescence;  $K_{nr}P$ : nonradiative decay rate of phosphorescence;  $K_rF = \Phi_F / \tau_F$ ;  $K_{nr}F = (1 - \Phi_F - \Phi_{Ph}) / \tau_F$ ;  $K_{isc} = \Phi_{Ph} / \tau_F$ ;  $K_rP = \Phi_{Ph} / \tau_{Ph}$ ;  $K_{nr}P = (1 - \Phi_{Ph}) / \tau_{Ph}$

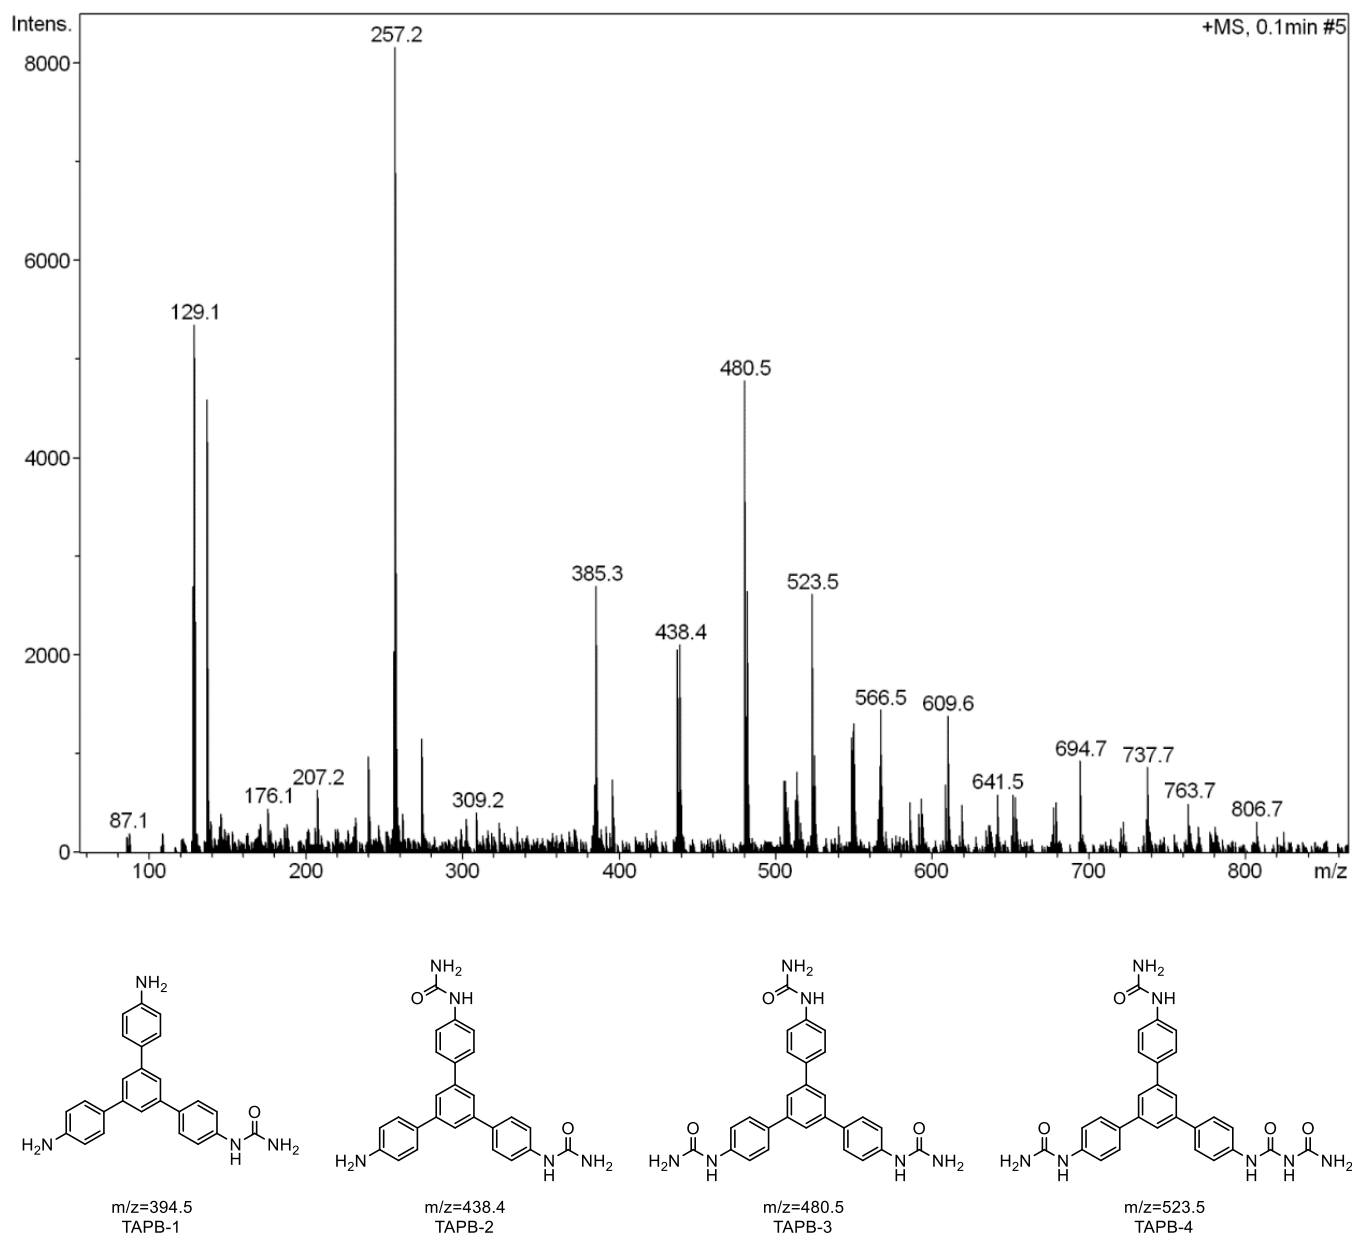

**Supplementary Fig. 6** High resolution mass spectrum and probable molecular units corresponding to the major peaks in mass spectrum of TAPB<sub>1.0%</sub>@U<sub>30</sub>.

## Supplementary Discussion 1

As shown in Fig. 3c, the characteristic peak attributed to urea at  $22.2^\circ$  could be clearly observed in  $\text{TAPB}_{0.1\%}@U_{10}$ , while the typical peaks of biuret appeared at  $18.4^\circ$ ,  $21.0^\circ$ ,  $24.7^\circ$ ,  $26.2^\circ$ , and  $31.5^\circ$ . With the extension of pyrolysis time, the characteristic peaks of urea in  $\text{TAPB}_{0.1\%}@U_{15}$  and  $\text{TAPB}_{0.1\%}@U_{20}$  gradually disappeared, and the characteristic peaks of biuret gradually increased. However, the characteristic peaks of biuret significantly weakened in  $\text{TAPB}_{0.1\%}@U_{25}$ , and the peak at  $28^\circ$  attributed to ammelide rapidly increased. The XRD spectra of  $\text{TAPB}_{0.1\%}@U_{30}$  and  $\text{TAPB}_{0.1\%}@U_{35}$  almost completely showed the characteristic peaks of ammelide. These results indicated that the urea pyrolysis conversion pathway involved urea-biuret-ammelide (Fig. 3d).

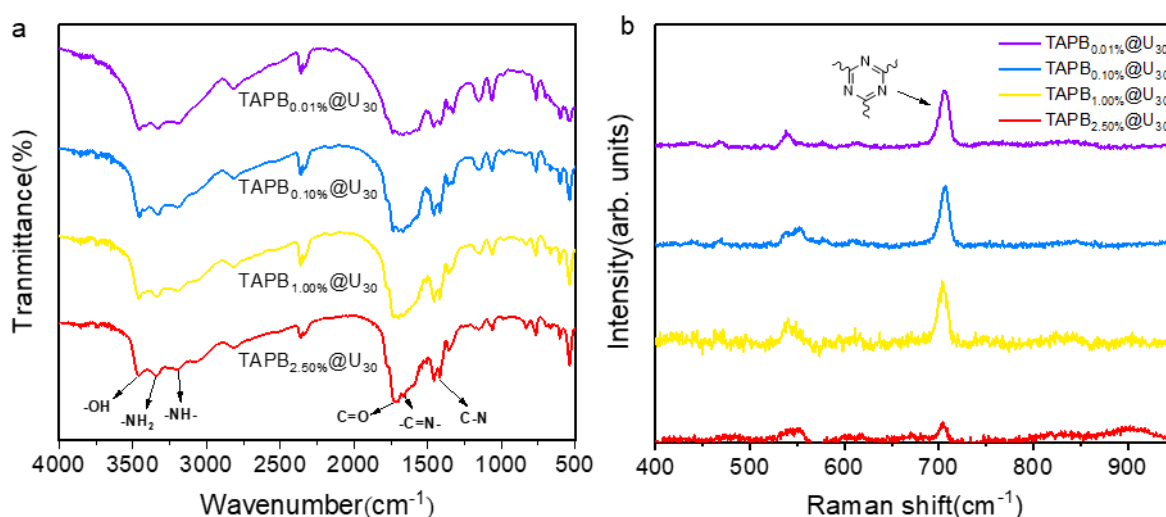

**Supplementary Fig. 7** (a) Fourier transform infrared (FTIR) spectra and (b) Raman spectra of  $\text{TAPB}_x@U_{30}$  ( $x = 0.01\%$ ,  $0.10\%$ ,  $1.00\%$  and  $2.50\%$ ) composites.

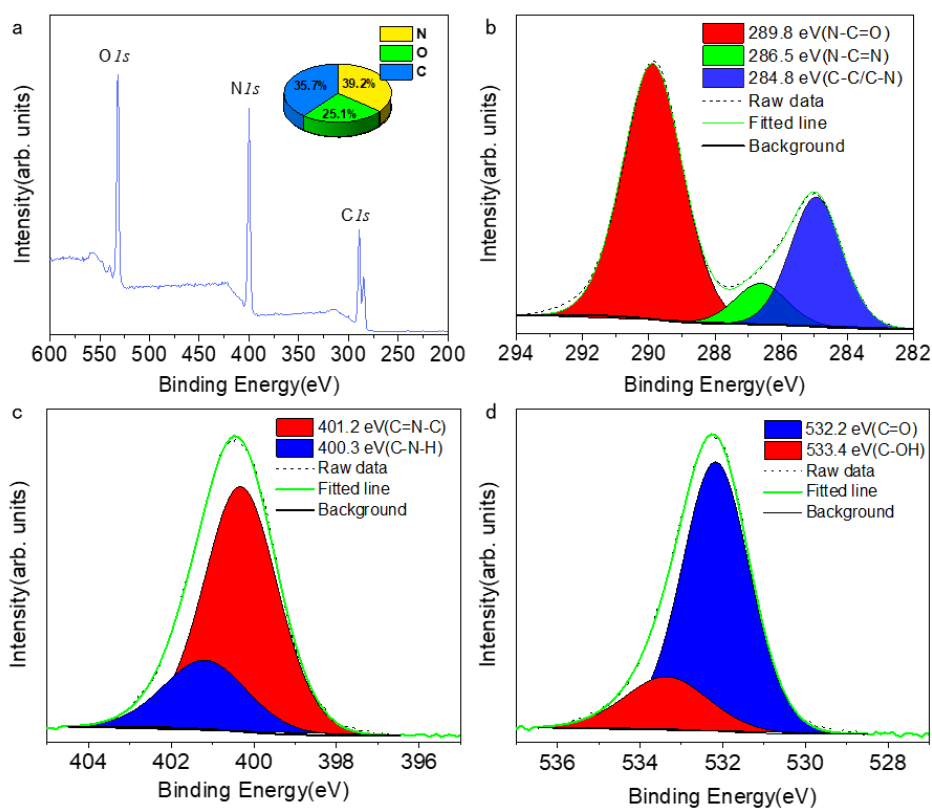

**Supplementary Fig. 8** (a) X-ray photoelectron spectra (XPS) survey scan and (b) *C*1s, (c) *N*1s, (d) *O*1s HRXPS spectra of TAPB<sub>0.1%</sub>@U<sub>30</sub>.

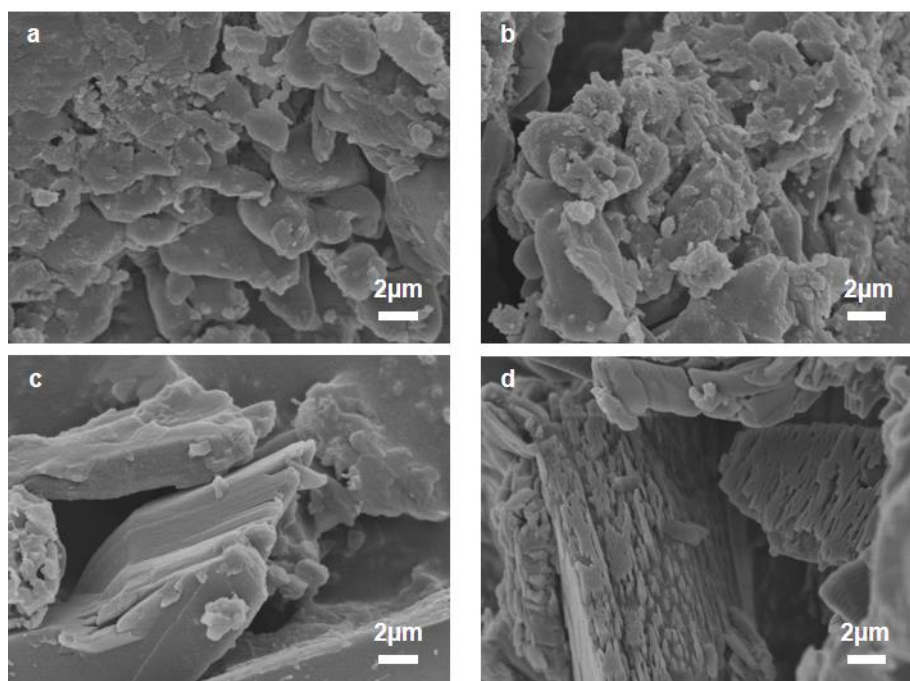

**Supplementary Fig. 9** Scanning Electron Microscope (SEM) images of (a) (b) TAPB<sub>0.1%</sub>@U<sub>10</sub> and (c) (d) TAPB<sub>0.1%</sub>@U<sub>30</sub>.

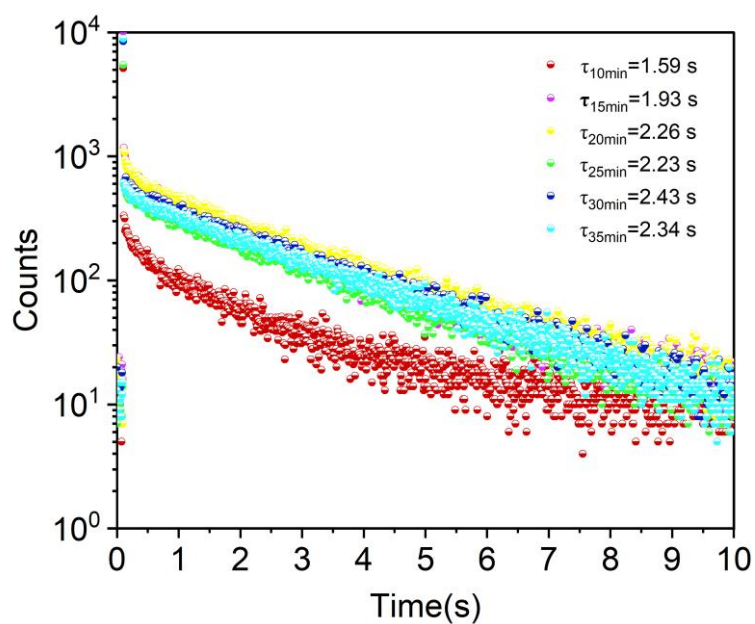

**Supplementary Fig. 10** Phosphorescence decay curves of  $\text{TAPB}_{0.1\%}@\text{U}_t$  ( $t=10, 15, 20, 25, 30, 35 \text{ min}$ ), excited at 365 nm and recorded at 519 nm, respectively.

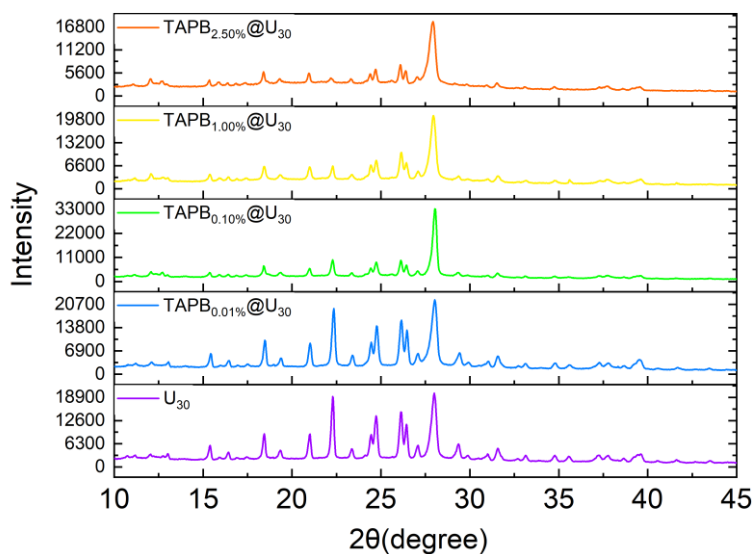

**Supplementary Fig. 11** PXRD patterns of  $\text{TAPB}_x@\text{U}_{30}$  ( $x = 0.01\%, 0.10\%, 1.00\%$  and  $2.50\%$ ) composites and urea pyrolyzed at  $220 \text{ }^\circ\text{C}$  for 30 min.

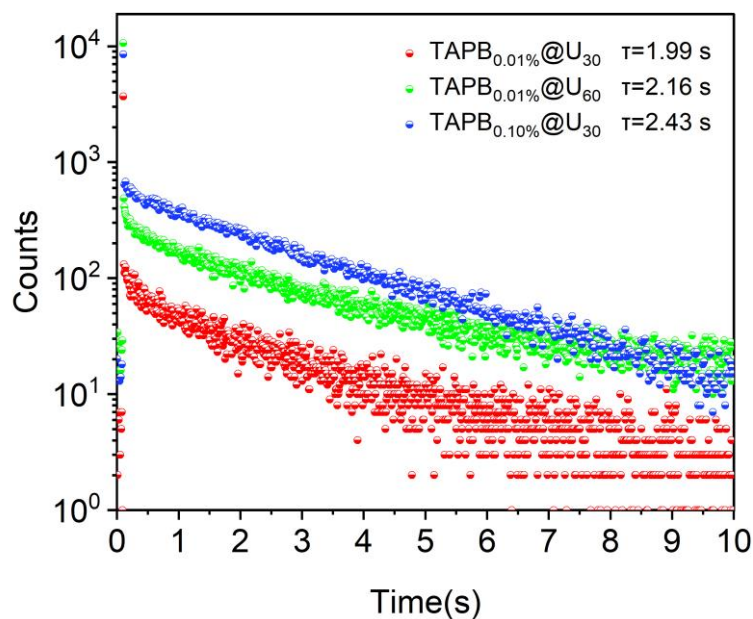

**Supplementary Fig. 12** Phosphorescence decay curve of TAPB<sub>0.01%</sub>@U<sub>30</sub>, TAPB<sub>0.01%</sub>@U<sub>60</sub> and TAPB<sub>0.1%</sub>@U<sub>30</sub>.

### Supplementary Discussion 2

As shown in Supplementary Fig. 11, some biurets still existed in TAPB<sub>0.01%</sub>@U<sub>30</sub>, resulting in less satisfactory phosphorescent performance. TAPB<sub>0.01%</sub>@U<sub>60</sub> prepared by extending the pyrolysis time had the same matrix composition as TAPB<sub>0.1%</sub>@U<sub>30</sub>, but its phosphorescence lifetime was still short due to inefficient energy transfer caused by lower content of guest molecules (Supplementary Fig. 12). Furthermore, poor crystallinity of the material caused by high content of guest molecules might be the main reason for the decrease in the RTP performance of TAPB<sub>2.5%</sub>@U<sub>30</sub> (Supplementary Fig. 11).



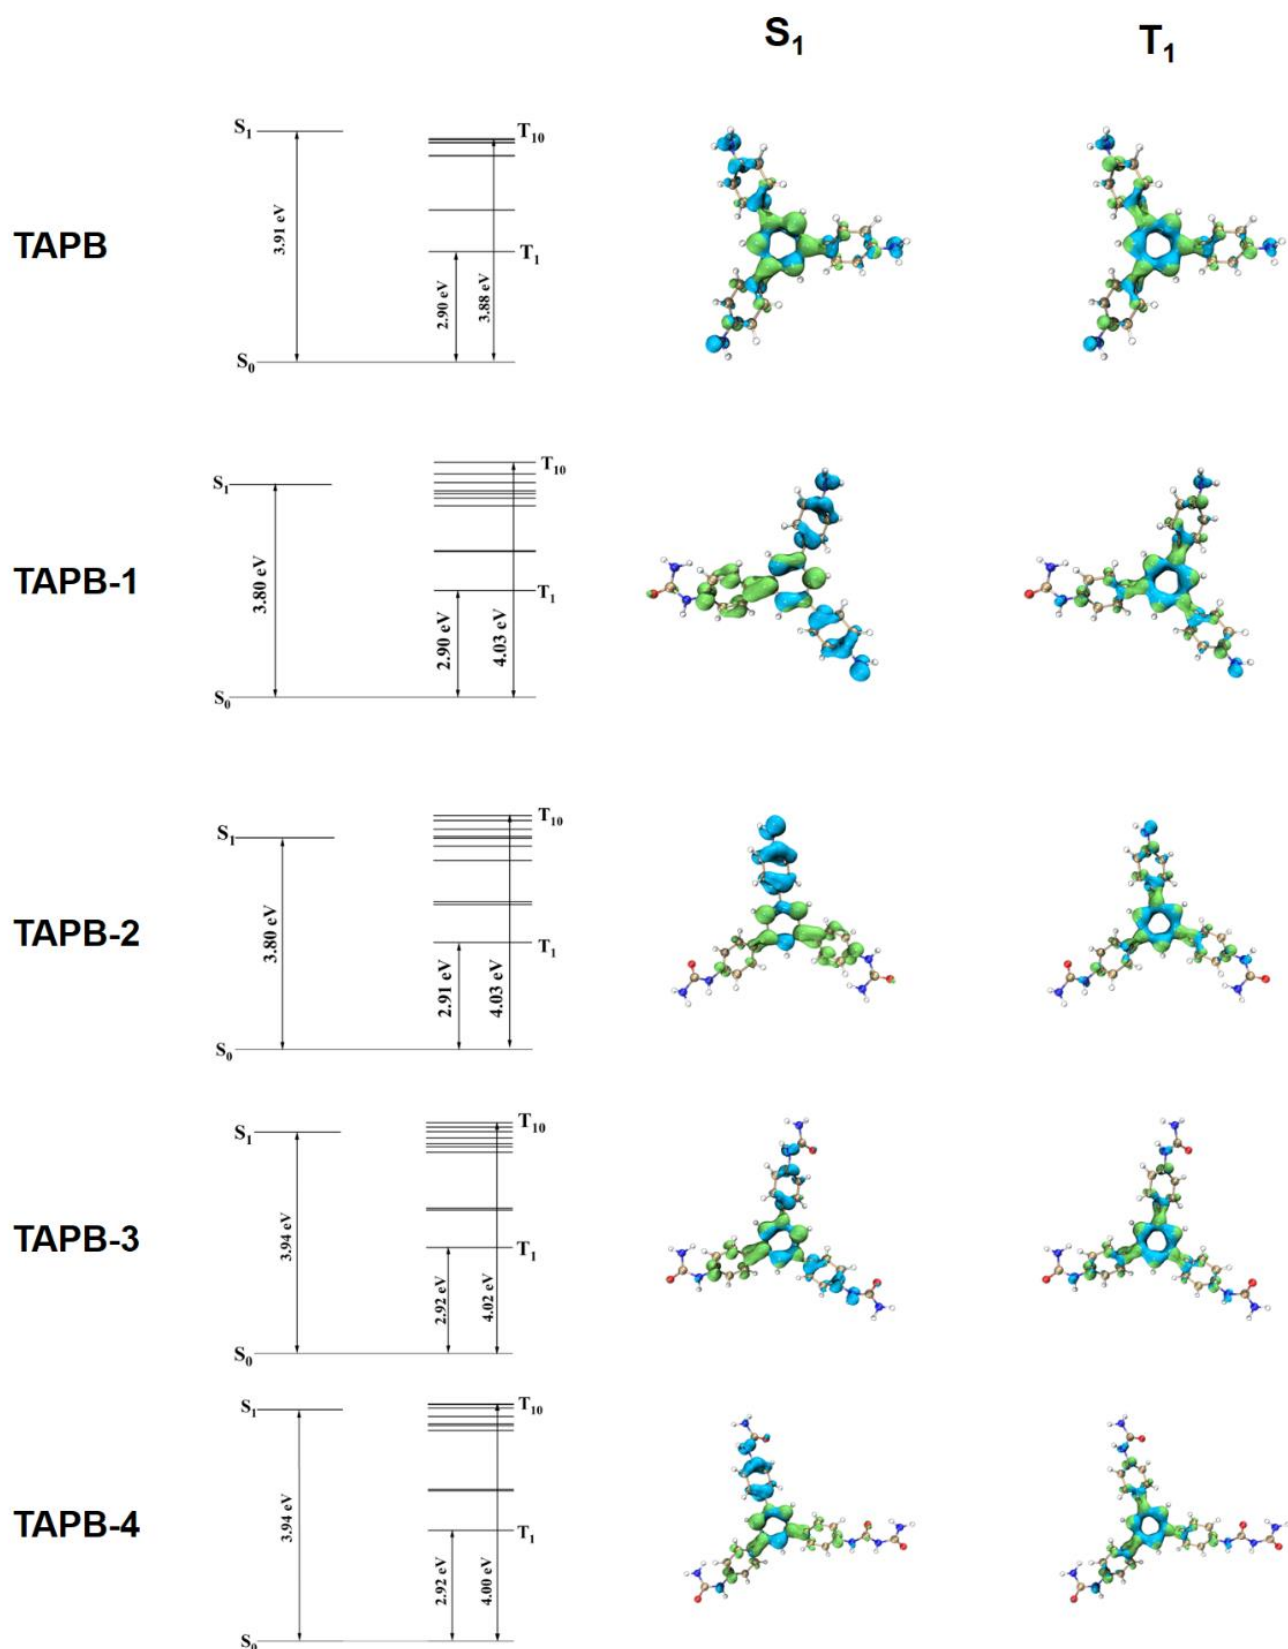

**Supplementary Fig. 13** The energy level diagrams, electron-hole isosurface maps of the  $S_0 \rightarrow S_1$ ,  $S_0 \rightarrow T_1$  transition of the TAPB and TAPB-N compounds. Blue and green isosurfaces correspond to hole and electron distributions, respectively<sup>1-4</sup>.

**Supplementary Table 2** Quantitative characterization of the distribution of holes and electrons

|                | TAPB                           |                                | TAPB-1                         |                                | TAPB-2                         |                                | TAPB-3                         |                                | TAPB-4                         |                                |
|----------------|--------------------------------|--------------------------------|--------------------------------|--------------------------------|--------------------------------|--------------------------------|--------------------------------|--------------------------------|--------------------------------|--------------------------------|
|                | S <sub>0</sub> →S <sub>1</sub> | S <sub>0</sub> →T <sub>1</sub> | S <sub>0</sub> →S <sub>1</sub> | S <sub>0</sub> →T <sub>1</sub> | S <sub>0</sub> →S <sub>1</sub> | S <sub>0</sub> →T <sub>1</sub> | S <sub>0</sub> →S <sub>1</sub> | S <sub>0</sub> →T <sub>1</sub> | S <sub>0</sub> →S <sub>1</sub> | S <sub>0</sub> →T <sub>1</sub> |
| <b>D-index</b> | 0.343                          | 0.029                          | 2.807                          | 0.181                          | 3.779                          | 0.209                          | 1.540                          | 0.070                          | 1.818                          | 0.054                          |
| <b>t-index</b> | -2.290                         | -2.512                         | 0.366                          | -2.461                         | 1.278                          | -2.477                         | -1.153                         | -2.679                         | -0.916                         | -2.655                         |

**D-index:** measure of the distance between the hole and the electron center of mass; **t-index:** measure the degree of separation of holes and electrons.

**Supplementary Table 3** Spin-orbit coupling (SOC) constants and singlet-triplet splitting energies ( $\Delta E_{ST}$ ) between the S<sub>0</sub>/S<sub>1</sub> and involved T<sub>n</sub> states of TAPB and TAPB-N compounds calculated in the gas phase.

|                                     | TAPB |                 | TAPB-1 |                 | TAPB-2 |                 | TAPB-3 |                 | TAPB-4 |                 |
|-------------------------------------|------|-----------------|--------|-----------------|--------|-----------------|--------|-----------------|--------|-----------------|
|                                     | SOC  | $\Delta E_{ST}$ | SOC    | $\Delta E_{ST}$ | SOC    | $\Delta E_{ST}$ | SOC    | $\Delta E_{ST}$ | SOC    | $\Delta E_{ST}$ |
| <b>S<sub>0</sub>→T<sub>1</sub></b>  | 0.30 | 2.903           | 0.34   | 2.895           | 0.37   | 2.905           | 0.36   | 2.921           | 0.34   | 2.92            |
| <b>S<sub>1</sub>→T<sub>1</sub></b>  | 0.27 | 1.010           | 0.30   | 0.901           | 0.29   | 0.897           | 0.35   | 1.021           | 0.39   | 1.022           |
| <b>S<sub>1</sub>→T<sub>2</sub></b>  | 0.03 | 0.664           | 0.14   | 0.569           | 0.35   | 0.568           | 0.20   | 0.686           | 0.17   | 0.691           |
| <b>S<sub>1</sub>→T<sub>3</sub></b>  | 0.02 | 0.663           | 0.30   | 0.552           | 0.05   | 0.540           | 0.09   | 0.669           | 0.17   | 0.671           |
| <b>S<sub>1</sub>→T<sub>4</sub></b>  | 0.32 | 0.244           | 0.03   | 0.186           | 0.19   | 0.196           | 0.08   | 0.170           | 0.05   | 0.170           |
| <b>S<sub>1</sub>→T<sub>5</sub></b>  | 0.18 | 0.239           | 0.58   | 0.127           | 0.60   | 0.090           | 0.18   | 0.116           | 0.37   | 0.095           |
| <b>S<sub>1</sub>→T<sub>6</sub></b>  | 0.16 | 0.238           | 0.30   | 0.085           | 0.13   | -0.025          | 0.28   | 0.088           | 0.26   | 0.093           |
| <b>S<sub>1</sub>→T<sub>7</sub></b>  | 0.08 | 0.079           | 0.21   | 0.034           | 0.32   | -0.053          | 0.40   | 0.066           | 0.32   | 0.057           |
| <b>S<sub>1</sub>→T<sub>8</sub></b>  | 0.16 | 0.075           | 0.26   | -0.067          | 0.27   | -0.080          | 0.09   | -0.014          | 0.14   | -0.021          |
| <b>S<sub>1</sub>→T<sub>9</sub></b>  | 0.22 | 0.057           | 0.17   | -0.078          | 0.19   | -0.154          | 0.56   | -0.037          | 0.52   | -0.033          |
| <b>S<sub>1</sub>→T<sub>10</sub></b> | 0.30 | 0.038           | 0.02   | -0.234          | 0.14   | -0.226          | 0.26   | -0.052          | 0.37   | -0.078          |

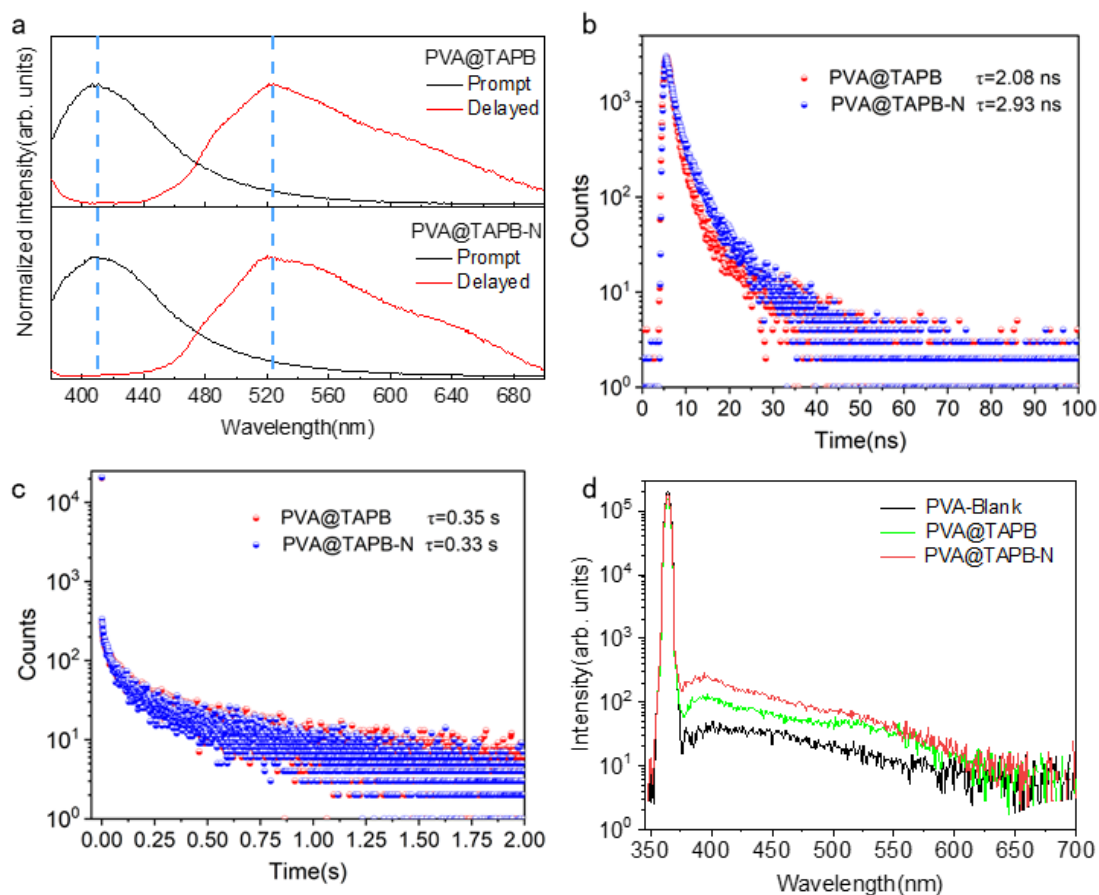

**Supplementary Fig. 14** Photophysical properties of PVA@TAPB and PVA@TAPB-N. (a) Normalized prompt, delayed PL spectra (delay 1 ms), (b) fluorescence decay curve, (c) phosphorescence decay curve, (d) Total photoluminescence quantum yield curve of PVA@TAPB and PVA@TAPB-N.

**Supplementary Table 4** Photophysical properties of TAPB and TAPB-N in PVA films under ambient conditions.

|               | $\lambda_F$<br>[nm] | $\lambda_{ph}$<br>[nm] | $\tau_F$<br>[ns] | $\tau_{Ph}$<br>[s] | $\Phi_F$<br>[%] | $\Phi_{Ph}$<br>[%] | $K_{rF}$<br>( $s^{-1}$ ) | $K_{nrF}$<br>( $s^{-1}$ ) | $K_{isc}$<br>( $s^{-1}$ ) | $K_{rP}$<br>( $s^{-1}$ ) | $K_{nrP}$<br>( $s^{-1}$ ) |
|---------------|---------------------|------------------------|------------------|--------------------|-----------------|--------------------|--------------------------|---------------------------|---------------------------|--------------------------|---------------------------|
| <b>TAPB</b>   | 409                 | 524                    | 2.08             | 0.36               | 1.85            | 1.33               | $8.89 \times 10^6$       | $4.65 \times 10^6$        | $6.39 \times 10^6$        | 0.037                    | 2.748                     |
| <b>TAPB-N</b> | 411                 | 523                    | 2.93             | 0.33               | 10.18           | 4.87               | $3.47 \times 10^7$       | $2.90 \times 10^6$        | $1.66 \times 10^7$        | 0.148                    | 2.891                     |

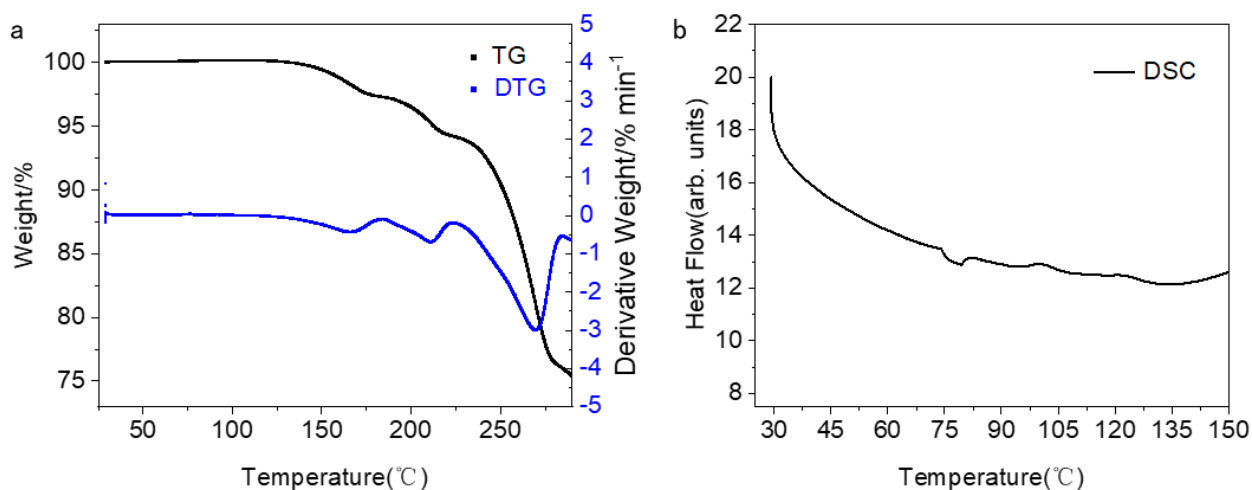

**Supplementary Fig. 15** (a) Thermogravimetric analysis (TGA) and derivative thermogravimetry (DTG) curves of TAPB<sub>0.1%</sub>@U<sub>30</sub>; (b) differential scanning calorimetry (DSC) curve of TAPB<sub>0.1%</sub>@U<sub>30</sub>.

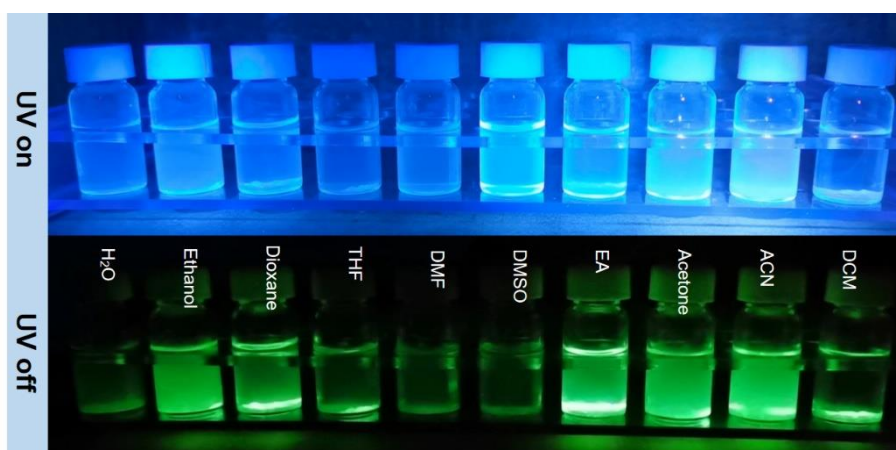

**Supplementary Fig. 16** Luminescence photographs of TAPB<sub>0.1%</sub>@U<sub>30</sub> in different solvents under and after UV irradiation.

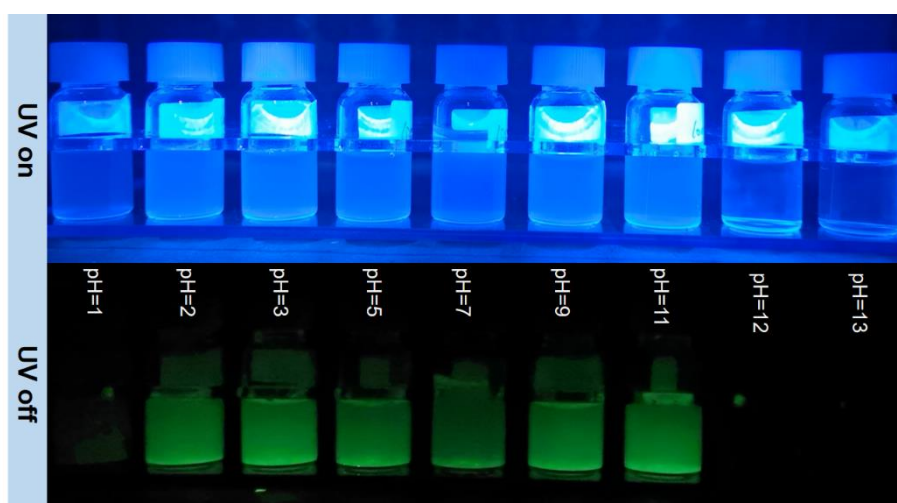

**Supplementary Fig. 17** Luminescence photographs of TAPB<sub>0.1%</sub>@U<sub>30</sub> dispersed in water at different pH values under and after UV irradiation.

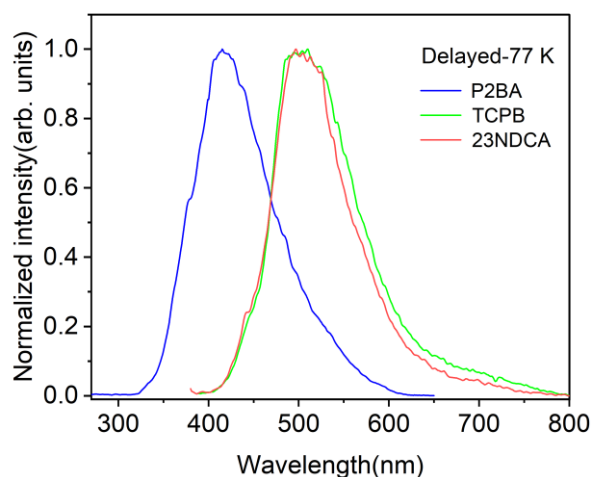

**Supplementary Fig. 18** Delay emission spectra of P2BA, TCPB and 23NDCA solution ( $1 \times 10^{-5}$  M) at 77 K (delay 1 ms).

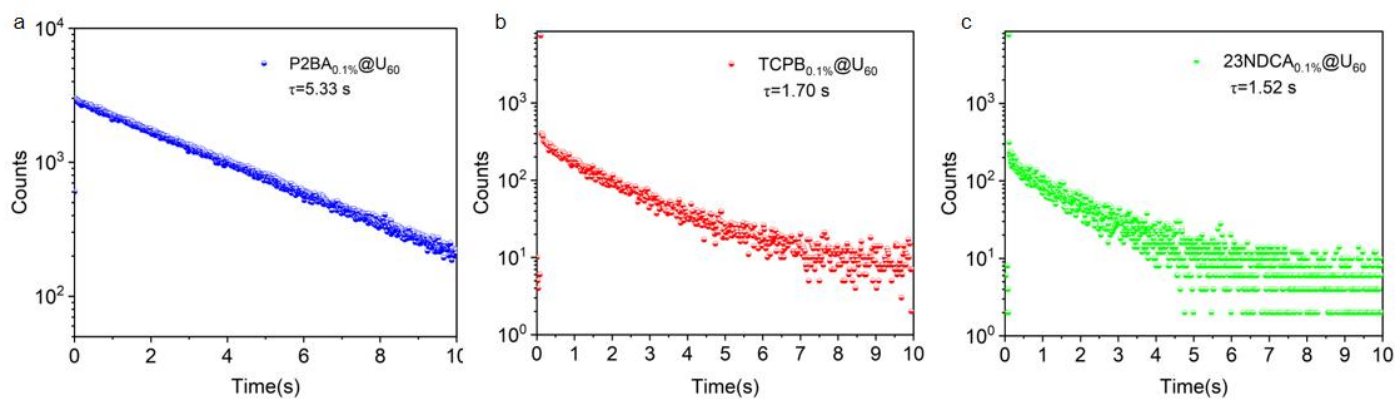

**Supplementary Fig. 19** Phosphorescence decay curve of (a) P2BA<sub>0.1%</sub>@U<sub>60</sub>; (b) TCPB<sub>0.1%</sub>@U<sub>60</sub> and (c) 23NDCA<sub>0.1%</sub>@U<sub>60</sub>.

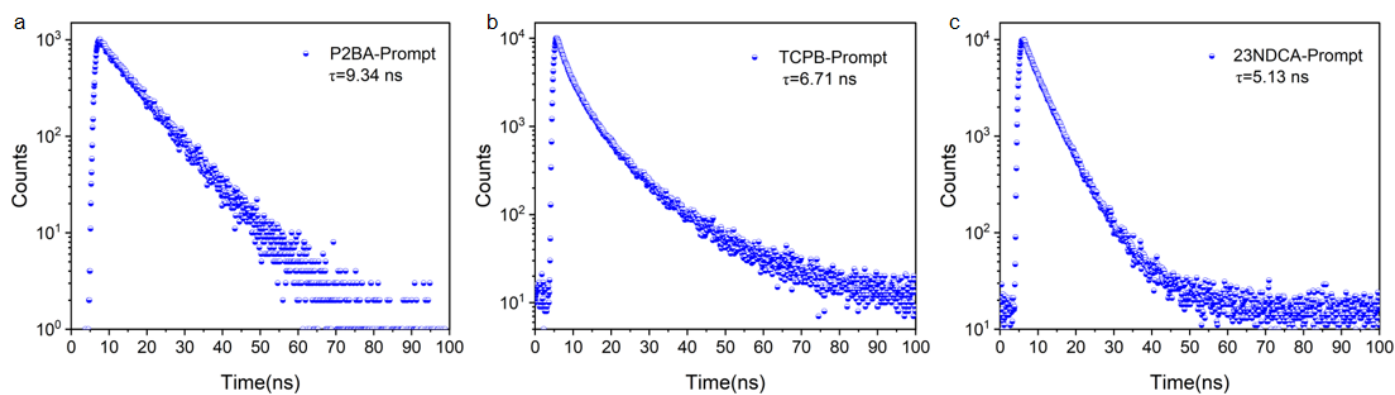

**Supplementary Fig. 20** Fluorescence decay curve of (a) P2BA<sub>0.1%</sub>@U<sub>60</sub>; (b) TCPB<sub>0.1%</sub>@U<sub>60</sub> and (c) 23NDCA<sub>0.1%</sub>@U<sub>60</sub>.

**Supplementary Table 5** Photophysical properties of P2BA<sub>0.1%</sub>@U<sub>60</sub>, TCPB<sub>0.1%</sub>@U<sub>60</sub> and 23NDCA<sub>0.1%</sub>@U<sub>60</sub> under ambient conditions.

|               | $\lambda_F$<br>[nm] | $\lambda_{ph}$<br>[nm] | $\tau_F$<br>[ns] | $\tau_{Ph}$<br>[s] | $\Phi_F$<br>[%] | $\Phi_{Ph}$<br>[%] | $K_{rF}$<br>(s <sup>-1</sup> ) | $K_{nrF}$<br>(s <sup>-1</sup> ) | $K_{isc}$<br>(s <sup>-1</sup> ) | $K_{rP}$<br>(s <sup>-1</sup> ) | $K_{nrP}$<br>(s <sup>-1</sup> ) |
|---------------|---------------------|------------------------|------------------|--------------------|-----------------|--------------------|--------------------------------|---------------------------------|---------------------------------|--------------------------------|---------------------------------|
| <b>P2BA</b>   | 328                 | 417                    | 9.34             | 5.33               | 3.30            | 10.82              | $3.53 \times 10^6$             | $9.19 \times 10^5$              | $1.16 \times 10^7$              | 0.020                          | 0.167                           |
| <b>TCPB</b>   | 424                 | 540                    | 6.71             | 1.70               | 26.37           | 10.26              | $3.93 \times 10^7$             | $9.44 \times 10^5$              | $1.53 \times 10^7$              | 0.060                          | 0.528                           |
| <b>23NDCA</b> | 426                 | 525                    | 5.13             | 1.52               | 11.60           | 5.88               | $2.26 \times 10^7$             | $1.61 \times 10^6$              | $1.15 \times 10^7$              | 0.039                          | 0.619                           |

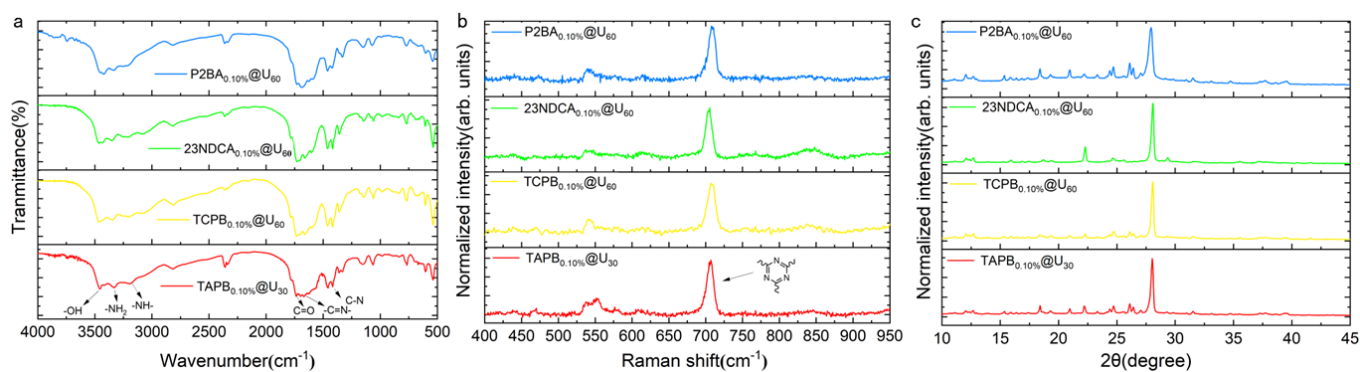

**Supplementary Fig. 21** (a) FTIR spectra, (b) Raman spectra and (c) PXRD spectra of P2BA<sub>0.1%</sub>@U<sub>60</sub>, TCPB<sub>0.1%</sub>@U<sub>60</sub>, 23NDCA<sub>0.1%</sub>@U<sub>60</sub> and TAPB<sub>0.1%</sub>@U<sub>30</sub>.

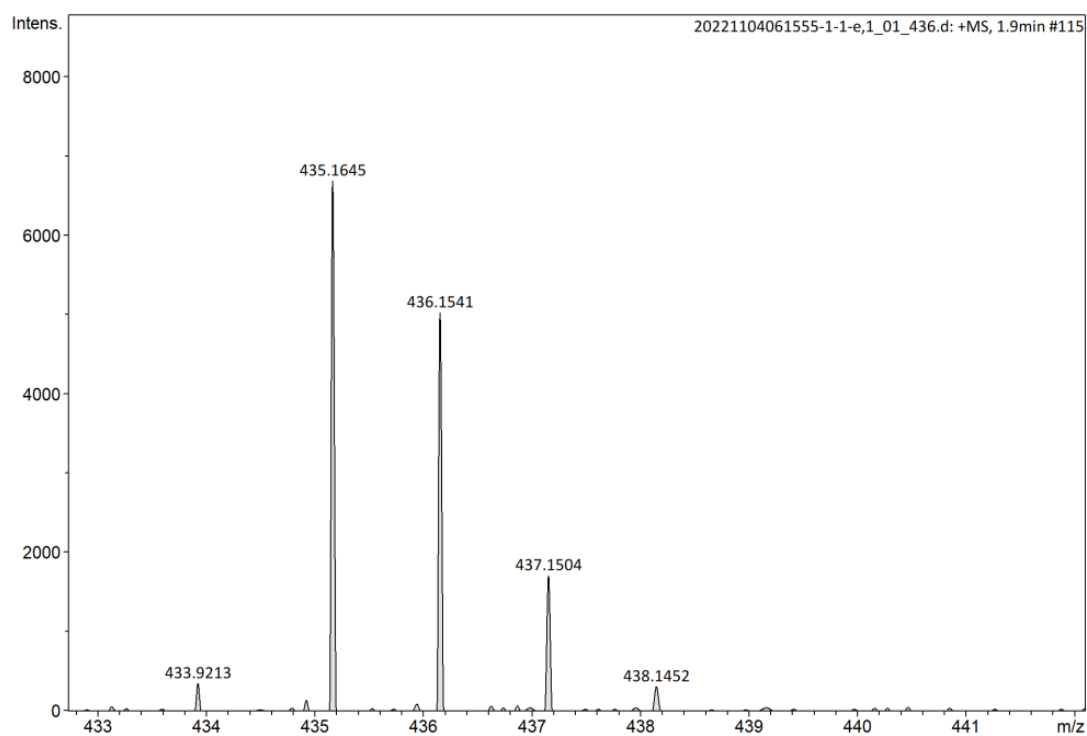

**Supplementary Fig. 22** High resolution mass spectrum of TCPB<sub>1.0%</sub>@U<sub>30</sub>.

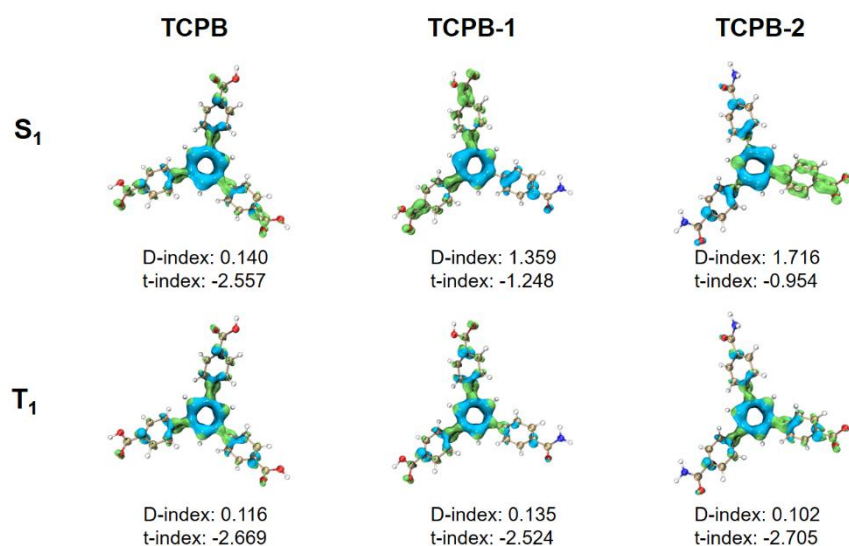

**Supplementary Fig. 23** Electron-hole isosurface maps of the  $S_0 \rightarrow S_1$ ,  $S_0 \rightarrow T_1$  transition of the TCPB, TCPB-1 and TCPB-2. Blue and green isosurfaces correspond to hole and electron distributions.

**Supplementary Table 6** Singlet-triplet splitting energies ( $\Delta E_{ST}$ ) and spin-orbit coupling (SOC) constants between the  $S_0/S_1$  and involved  $T_n$  states of TCPB and TCPB-N calculated in the gas phase.

|                                     | TCPB            |      | TCPB-1          |      | TCPB-2          |      |
|-------------------------------------|-----------------|------|-----------------|------|-----------------|------|
|                                     | $\Delta E_{ST}$ | SOC  | $\Delta E_{ST}$ | SOC  | $\Delta E_{ST}$ | SOC  |
| <b>S<sub>0</sub>→T<sub>1</sub></b>  | 2.883           | 0.60 | 2.890           | 1.76 | 2.900           | 1.38 |
| <b>S<sub>1</sub>→T<sub>1</sub></b>  | 1.062           | 0.74 | 0.989           | 0.69 | 0.979           | 0.71 |
| <b>S<sub>1</sub>→T<sub>2</sub></b>  | 0.749           | 0.11 | 0.688           | 0.19 | 0.665           | 0.32 |
| <b>S<sub>1</sub>→T<sub>3</sub></b>  | 0.742           | 0.22 | 0.640           | 0.31 | 0.627           | 0.10 |
| <b>S<sub>1</sub>→T<sub>4</sub></b>  | 0.149           | 0.18 | 0.095           | 0.24 | 0.092           | 0.17 |
| <b>S<sub>1</sub>→T<sub>5</sub></b>  | 0.135           | 0.23 | 0.083           | 0.27 | 0.080           | 0.30 |
| <b>S<sub>1</sub>→T<sub>6</sub></b>  | 0.122           | 0.11 | 0.069           | 0.28 | 0.028           | 0.33 |
| <b>S<sub>1</sub>→T<sub>7</sub></b>  | 0.078           | 0.02 | -0.051          | 0.19 | -0.056          | 0.05 |
| <b>S<sub>1</sub>→T<sub>8</sub></b>  | -0.063          | 0.27 | -0.115          | 0.33 | -0.108          | 0.50 |
| <b>S<sub>1</sub>→T<sub>9</sub></b>  | -0.064          | 0.32 | -0.126          | 0.30 | -0.125          | 0.37 |
| <b>S<sub>1</sub>→T<sub>10</sub></b> | -0.066          | 0.26 | -0.129          | 0.29 | -0.129          | 0.52 |
| <b>S<sub>1</sub>→T<sub>11</sub></b> | /               | /    | -0.293          | 0.34 | -0.291          | 0.52 |

### Supplementary Discussion 3

As shown in Supplementary Fig. 22, the derivatives of TCPB were successfully generated during the co-pyrolysis of TCPB and urea. To evaluate similar effect of the derivative to TAPB-N in promoting ISC, hole-electron analysis was performed to describe the electron excitation characteristics of TCPB and its derivatives. As shown in Supplementary Fig. 23, the distribution of excited-state electron density of  $S_1$  changed significantly due to the introduction of the amino group that served as an electron-donating moiety. Unlike carbonyl group, the introduction of amino group increased the electron cloud density near the amino region, further enhancing the separation of electrons and holes throughout the derivative molecule. Further calculations have also confirmed the important contribution of this transition to increasing the SOC constant and promoting the ISC process. Compared to TCPB, the SOC constant of derivatives significantly increased, which could provide more channels for ISC (Supplementary Table 6).

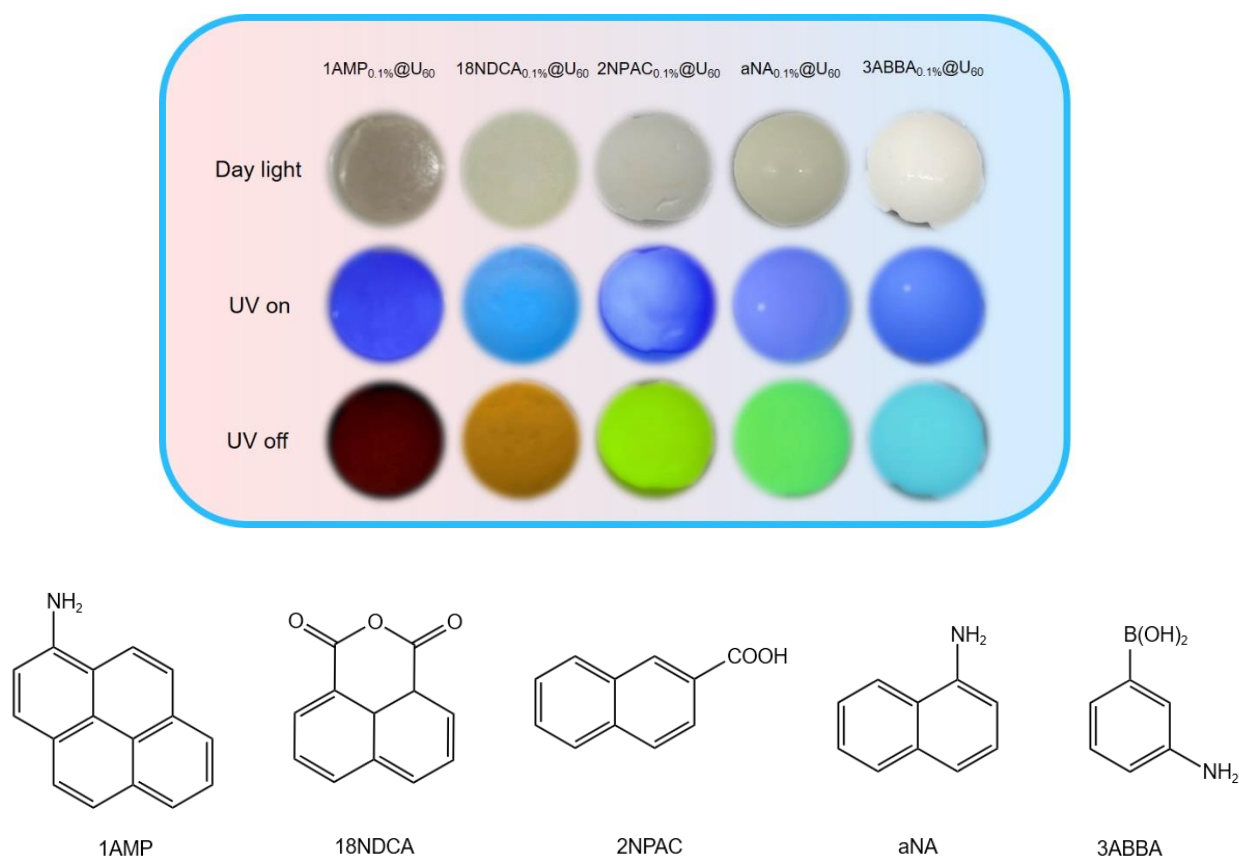

**Supplementary Fig. 24** Photographs of polychromatic RTP composites before and after turning off 365 nm UV light, and the corresponding guest molecules of polychromatic RTP composites.



**Supplementary Table 7** Some photophysical properties of polychromatic RTP composites.

| XXX <sub>0.1%</sub> @U <sub>60</sub> | $\lambda_F$ (nm) | $\lambda_{Ph1}$ (nm) | $\tau_{Ph1}$ (s) | $\lambda_{Ph2}$ (nm) | $\tau_{Ph2}$ (ms) | PLQY(%) |
|--------------------------------------|------------------|----------------------|------------------|----------------------|-------------------|---------|
| <b>3ABBA</b>                         | 409              | 454                  | 1.13             |                      |                   | 70.38   |
| <b>aNA</b>                           | 392              | 490                  | 1.48             | 520                  | 1.52              | 14.63   |
| <b>2NPAC</b>                         | 417              | 540                  | 0.96             | 593                  | 0.93              | 59.50   |
| <b>18NDCA</b>                        | 478              | 567                  | 0.29             | 607                  | 0.34              | 11.94   |
| <b>1AMP</b>                          | 409              | 621                  | 0.17             | 671                  | 0.17              | 7.60    |

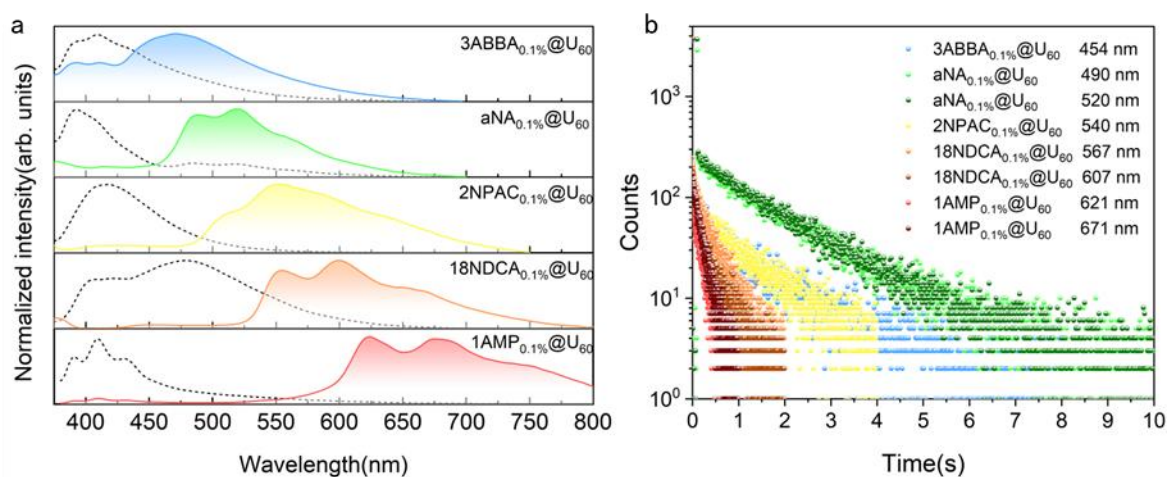

**Supplementary Fig. 25** (a) Normalized prompt, delayed PL spectra (delay 1 ms) and (b) phosphorescence decay curve of 3ABBA<sub>0.1%</sub>@U<sub>60</sub>, aNA<sub>0.1%</sub>@U<sub>60</sub>, 2NPAC<sub>0.1%</sub>@U<sub>60</sub>, 18NDCA<sub>0.1%</sub>@U<sub>60</sub> and 1AMP<sub>0.1%</sub>@U<sub>60</sub>.

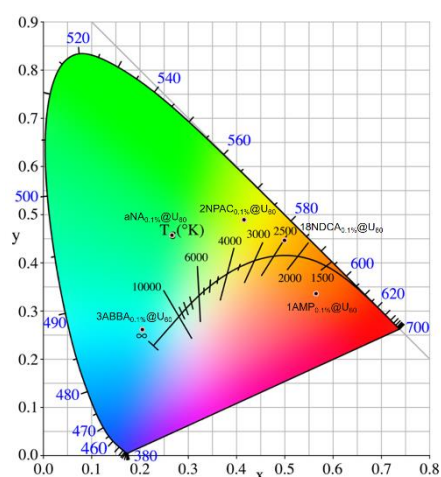

**Supplementary Fig. 26** The CIE coordinates of 3ABBA<sub>0.1%</sub>@U<sub>60</sub>, aNA<sub>0.1%</sub>@U<sub>60</sub>, 2NPAC<sub>0.1%</sub>@U<sub>60</sub>, 18NDCA<sub>0.1%</sub>@U<sub>60</sub> and 1AMP<sub>0.1%</sub>@U<sub>60</sub>.

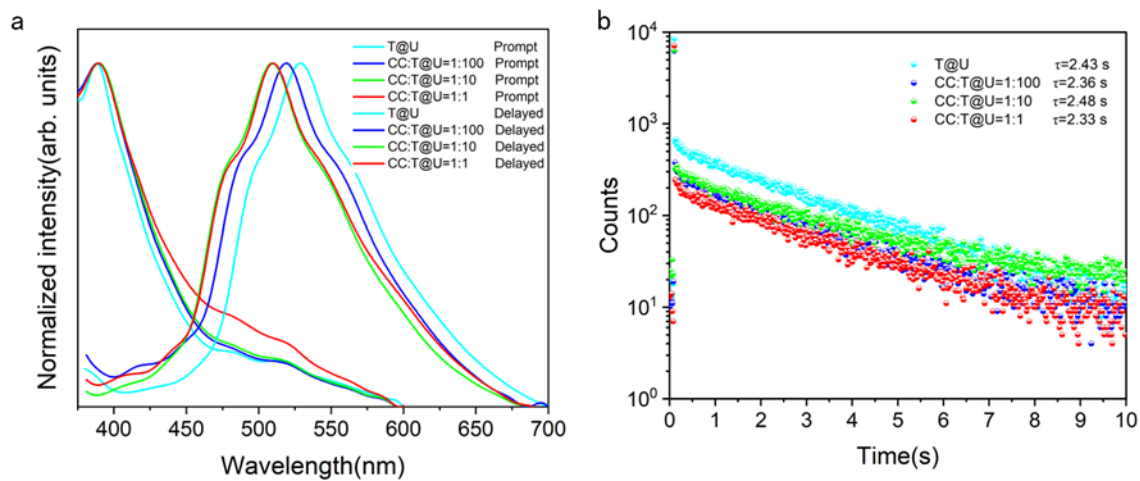

**Supplementary Fig. 27** (a) Normalized prompt, delayed PL spectra (delay 1 ms) and (b) phosphorescence decay curve of TAPB<sub>0.1%</sub>@U<sub>30</sub> (T@U) with different content of choline chloride (CC).

## Supplementary References

- 1 Lu, T. & Chen, F. Multiwfn: a multifunctional wavefunction analyzer. *J. Comput. Chem.* **33**, 580-592, doi:10.1002/jcc.22885 (2012).
- 2 Liu, Z., Lu, T. & Chen, Q. An sp-hybridized all-carboatomic ring, cyclo[18]carbon: Electronic structure, electronic spectrum, and optical nonlinearity. *Carbon* **165**, 461-467, doi:10.1016/j.carbon.2020.05.023 (2020).
- 3 Humphrey, W., Dalke, A. & Schulten, K. VMD: Visual Molecular Dynamics. *J. Mol. Graphics* **14**, 33-38 (1996).
- 4 Neese, F. Software update: the ORCA program system, version 4.0. *WIREs Computational Molecular Science* **8**, doi:10.1002/wcms.1327 (2017).
